# Supplementary material
Source: MDPI journal article supplement (https://www.mdpi.com/2076-3298/2/4/449)
Supplement: s1 [file s1]

# Consumers' Willingness to Pay for Cabbage with Minimized Pesticide Residues in Southern Benin

**Table S1.1.** House types.

| House Status     | Wall                                                          | Roof                                  | Floor             | Bath Place         | Toilets          |
|------------------|---------------------------------------------------------------|---------------------------------------|-------------------|--------------------|------------------|
| Poor quality     | Local material or brick ± any improvement but not tiled.      | not paved                             | Cemented at most  | Annex without roof | Poor quality     |
| Improved quality | With brick, Roughcast ± painted                               | corrugated iron/tile covered          | Cemented or tiled | Dependent          | Improved quality |
| Modern           | With brick, Roughcast painted inside and tiled or not outside | corrugated iron/tile covered or paved | Cemented or tiled | Dependent          | Modern           |

**Table S1.2.** Assets and wealth classifications.

| Wealth class | Means of transport                  | Means of fresh food preserving | Total annual income (FCFA) |
|--------------|-------------------------------------|--------------------------------|----------------------------|
| Poor class   | At most one small motorbike         | Unavailable                    | ≤380.000                   |
| Middle class | At most a small and second hand car | At most a refrigerator         | 380.000–1200.000           |
| High class   | At least a well maintained car      | At least a refrigerator        | >1.200.000                 |

Note: € 1 = FCFA 656.

**Table S1.3.** Consumers' wealth classes.

| Wealth class | House status     | Transport means | Fresh foods preserving means |
|--------------|------------------|-----------------|------------------------------|
| Poor         | Poor quality     | Poor class      | Poor class                   |
| Middle       | Improved quality | Middle class    | Middle class                 |
| Rich         | Modern           | High class      | High class                   |
